# Supplementary material for: Ultrastructural and Functional Characterization of Mitochondrial Dynamics Induced by Human Respiratory Syncytial Virus Infection in HEp-2 Cells
Source: MDPI journal article supplement (doi:10.3390/v15071518), 2023-07-07
Supplement: s1 [file s1]

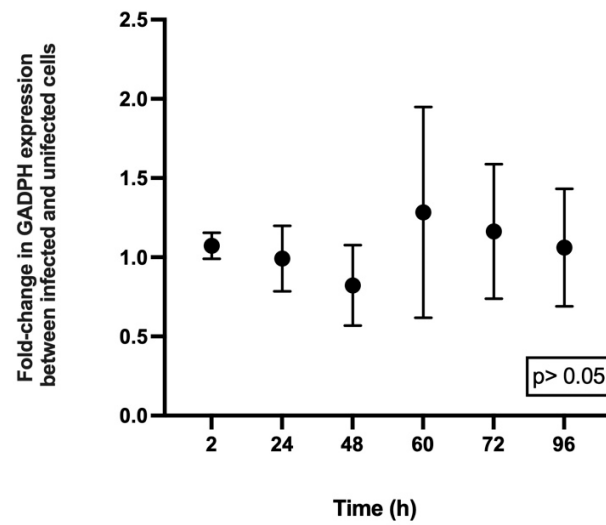

**Figure S1. Fold-change in GAPDH expression between infected and uninfected cells.** The fold change in gene expression was calculated using the  $2^{-\Delta C_t}$  method. The values represent mean fold change with standard deviation. No statistically significant relationship exists between infected and uninfected cell expression of GAPDH.

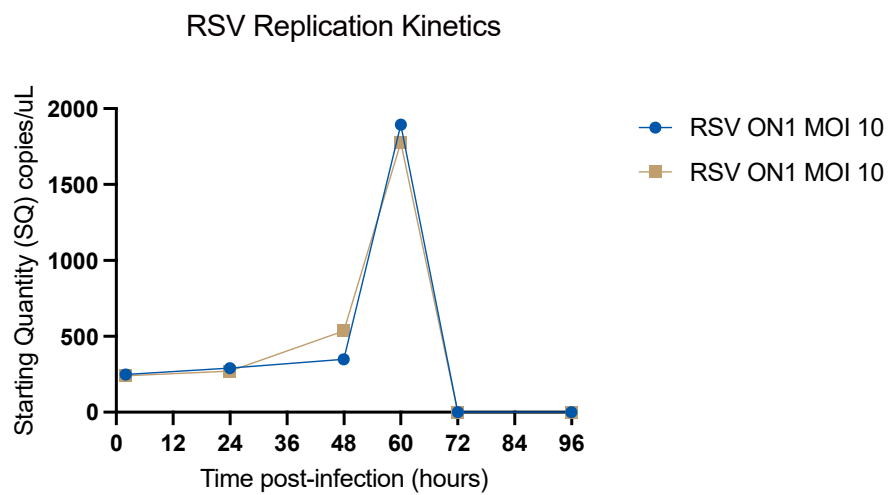

**Figure S2. Kinetics of hRSV ON1 infection in vitro assays.** Hep-2 cell monolayers were infected with hRSV ON1 at a multiplicity of infection (MOI) 10. At various times post-infection, total virus (copy/uL) in the total RNA were determined. In each assay, the experimental data (circles) were collected in duplicate (MOI 10). The effect of hRSV infection at 60-h.p.i. was analyzed only by RT-qPCR but not for the ultra-structural analysis.
